# Supplementary material
Source: Research Square preprint supplement (doi:10.21203/rs.3.rs-9865692/v1)
Supplement: Supplementary file 1 [file 9026e9dc67d214747e66c20a.docx]

**Supplementary Table 1. Treatment-augmented sensitivity modelsa for SVI and overall survival in GBM**

| **SVI scale** | **SVI measure** | **n** | **Deaths** | **HR** | **95% CI** | **P value** |
| --- | --- | --- | --- | --- | --- | --- |
| County | Per 0.1 increase | 397 | 252 | 1.02 | 0.97–1.06 | 0.486 |
| County | Quartile 2 vs quartile 1 | 397 | 252 | 1.13 | 0.71–1.78 | 0.607 |
| County | Quartile 3 vs quartile 1 | 397 | 252 | 1.00 | 0.66–1.52 | 0.994 |
| County | Quartile 4 vs quartile 1 | 397 | 252 | 1.15 | 0.83–1.60 | 0.387 |
| Census tract | Per 0.1 increase | 261 | 157 | 1.07 | 1.00–1.15 | 0.055 |
| Census tract | Quartile 2 vs quartile 1 | 261 | 157 | 1.17 | 0.73–1.87 | 0.504 |
| Census tract | Quartile 3 vs quartile 1 | 261 | 157 | 1.36 | 0.84–2.18 | 0.207 |
| Census tract | Quartile 4 vs quartile 1 | 261 | 157 | 1.63 | 0.99–2.68 | 0.056 |

Abbreviations: CI, confidence interval; GBM, IDH-wildtype glioblastoma; HR, hazard ratio; SVI, Social Vulnerability Index.

a Treatment-augmented models included the primary adjustment variables plus receipt of surgery, radiation therapy, chemotherapy, and clinical trial treatment.

**Supplementary Table 2. Secondary regional survival comparisonsa**

| **Comparisonb** | **Cohort/analysis** | **Outcome** | **Result** |
| --- | --- | --- | --- |
| Houston-area vs non-Houston-area | GBM | Median overall survival | 28.8 months vs 28.3 months |
| Houston-area vs non-Houston-area | GBM | 24-month overall survival | 48.7% vs 47.9% |
| Houston-area vs non-Houston-area | Astrocytomac | Median overall survival | Not reached |
| Houston-area vs non-Houston-area | Astrocytomac | 24-month overall survival | 84.0% vs 86.5% |
| West Texas vs East Texas | County-based regional comparison | Median overall survival | 23.36 months vs 21.16 months |
| West Texas vs East Texas | County-based regional comparison | Log-rank test | χ²=4.704; P=0.030 |
| West Texas vs East Texas | County-based regional comparison | Cox model | HR, 0.76; 95% CI, 0.58–0.99 |

Abbreviations: CI, confidence interval; GBM, IDH-wildtype glioblastoma; HR, hazard ratio.

a These analyses were exploratory and contextual and were not part of the primary SVI survival models.

b Houston-area refers to the predefined 9-county region; non-Houston-area refers to Texas patients outside that region.

cThe astrocytoma cohort includes patients with IDH-mutant World Health Organization Central Nervous System grade 4 astrocytoma.
