# Supplementary material
Source: Research Square preprint supplement (doi:10.21203/rs.3.rs-9865692/v1)
Supplement: Supplementary file 2 [file f50635646afcde8db560e25d.docx]

**TABLES**

Table 1. Patient, SVI data, and selected clinical characteristics by analytic cohorta

| **Characteristic** | **GBM** (n=400) | **Astrocytomab** (n=64) | |
| --- | --- | --- | --- |
| Patient characteristics |  |  | |
| Age at diagnosis, median (IQR), years | 61 (51–68) | 35 (27–42) | |
| Female sex, n (%) | 154 (38.5) | 26 (40.6) | |
| Death at last follow-up, n (%) | 255 (63.8) | 24 (37.5) | |
| SVI distribution |  |  |
| County-level SVI, median (IQR) | 0.613 (0.166–0.834) | 0.834 (0.502–0.834) | |
| County-level SVI, range | 0.040–0.949 | 0.047–0.929 | |
| Houston-area census tract–linked subset, n | 265 | 41 | |
| Census tract–level SVI, n | 261 | 41 | |
| Census tract–level SVI, median (IQR) | 0.239 (0.104–0.447) | 0.215 (0.128–0.375) | |
| Census tract–level SVI, range | 0.001–0.971 | 0.001–0.874 | |
| Selected clinical characteristics |  |  | |
| Private/commercial insurance, n (%) | 223 (55.8) | 42 (65.6) | |
| Medicare/Medicaid insurance, n (%) | 171 (42.8) | 18 (28.1) | |
| Self-pay, n (%) | 5 (1.3) | 0 (0.0) | |
| Other/unknown/not available insurance, n (%) | 1 (0.3) | 4 (6.3) | |
| KPS at diagnosis, n | 398 | 64 | |
| KPS ≥70, n (%)c | 377 (94.7) | 62 (96.9) | |
| KPS <70, n (%)c | 21 (5.3) | 2 (3.1) | |
| Gross total resection, n (%) | 186 (46.5) | 28 (43.8) | |
| Less than gross total resection, n (%) | 88 (22.0) | 21 (32.8) | |
| Biopsy, stereotactic biopsy, or unknown or missing data on extent of resection, n (%) | 126 (31.5) | 15 (23.4) | |

Abbreviations: GBM, IDH-wildtype glioblastoma; IQR, interquartile range; KPS, Karnofsky Performance Status; SVI, Social Vulnerability Index.

a Percentages may not sum to 100 because of rounding.

bThe astrocytoma cohort included patients with IDH-mutant World Health Organization Central Nervous System grade 4 astrocytoma.

c The denominators for these calculations were the number of patients with KPS information in each cohort (ie, 398 for the GBM cohort and 64 for the astrocytoma cohort).

**Table 2. Cox models for SVI and overall survival**

| **Cohorta** | **SVI scale** | **SVI measureb** | **n** | **Deaths** | **HR** | **95% CI** | **P value** |
| --- | --- | --- | --- | --- | --- | --- | --- |
| GBM | County | Per 0.1 increase | 397 | 252 | 1.01 | 0.97–1.06 | 0.551 |
| GBM | County | Quartile 2 vs quartile 1 | 397 | 252 | 1.06 | 0.67–1.65 | 0.813 |
| GBM | County | Quartile 3 vs quartile 1 | 397 | 252 | 0.94 | 0.62–1.42 | 0.761 |
| GBM | County | Quartile 4 vs quartile 1 | 397 | 252 | 1.14 | 0.82–1.58 | 0.423 |
| GBM | Census tract | Per 0.1 increase | 261 | 157 | 1.06 | 0.99–1.14 | 0.122 |
| GBM | Census tract | Quartile 2 vs quartile 1 | 261 | 157 | 1.12 | 0.70–1.77 | 0.642 |
| GBM | Census tract | Quartile 3 vs quartile 1 | 261 | 157 | 1.16 | 0.73–1.84 | 0.531 |
| GBM | Census tract | Quartile 4 vs quartile 1 | 261 | 157 | 1.47 | 0.91–2.36 | 0.113 |
| Astrocytoma, IDH-mutant, CNS WHO grade 4 | County | Per 0.1 increase | 64 | 24 | 1.07 | 0.92–1.24 | 0.396 |
| Astrocytoma, IDH-mutant, CNS WHO grade 4 | Census tract | Per 0.1 increase | 41 | 12 | 1.10 | 0.84–1.44 | 0.503 |

Abbreviations: CI, confidence interval; GBM, IDH-wildtype glioblastoma; HR, hazard ratio; SVI, Social Vulnerability Index.

a GBM models adjusted for age at diagnosis, sex, Karnofsky Performance Status at diagnosis, extent of resection, MGMT promoter methylation status, insurance status, and distance to UT MD Anderson. Astrocytoma analyses were exploratory SVI-only Cox models because of smaller sample size and fewer events.

b Quartile 1 was the reference group for comparisons between quartile groups.

cThe astrocytoma cohorts included patients with IDH-mutant World Health Organization Central Nervous System grade 4 astrocytoma.

**Table 3. Access-sensitive findings in the Houston-area GBM cohort**

**A. Exploratory screening by Houston-area census tract–level SVI quartile**

| **Variable** | **n** | **P value** | **FDR q value** | **Screening resulta** |
| --- | --- | --- | --- | --- |
| County of residence | 261 | <0.001 | <0.001 | Significant after FDR correction |
| KPS category | 261 | 0.006 | 0.020 | Significant after FDR correction |
| Marital status | 261 | 0.016 | 0.048 | Significant after FDR correction |
| Insurance status | 261 | 0.021 | 0.059 | Not significant after FDR correction |

**B. Selected descriptive patterns by Houston-area census tract–level SVI quartile**

| **Characteristic** | **Quartile 1**  **(n=66)** | **Quartile 2**  **(n=66)** | **Quartile 3**  **(n=64)** | **Quartile 4**  **(n=65)** |
| --- | --- | --- | --- | --- |
| Non-private insurance, n (%) | 26 (39.4) | 30 (45.5) | 35 (54.7) | 34 (52.3) |
| KPS <70, n (%) | 0 (0.0) | 8 (12.1) | 1 (1.6) | 4 (6.2) |
| Gross total resection, n (%) | 36 (54.5) | 36 (54.5) | 25 (39.1) | 28 (43.1) |

**C. Age- and sex-adjusted logistic regression models**

| **Outcome** | **SVI measure** | **n** | **OR** | **95% CI** | **P value** |
| --- | --- | --- | --- | --- | --- |
| Non-private insurance | Per 0.1 increase in Houston-area census tract–level SVI | 261 | 1.14 | 1.00–1.28 | 0.044 |
| Non-private insurance | Quartile 4 vs quartile 1 | 261 | 2.39 | 1.06–5.41 | 0.036 |
| Less than gross total resection | Per 0.1 increase in Houston-area census tract–level SVI | 261 | 1.10 | 0.99–1.23 | 0.070 |

Abbreviations: CI, confidence interval; FDR, false discovery rate; GBM, IDH-wildtype glioblastoma; KPS, Karnofsky Performance Status; OR, odds ratio; SVI, Social Vulnerability Index.

a Screening results are based on comparisons across census tract–level SVI quartiles with Benjamini-Hochberg FDR correction. Insurance status did not remain significant after FDR correction in categorical screening, whereas binary non-private insurance was associated with census tract–level SVI in prespecified age- and sex-adjusted logistic models.
